# Supplementary material for: Investigation of interest in and timing preference for cancer predisposition testing and expanded carrier screening among women of reproductive age
Source: PubMed Central journal article supplement — PEC Innov. 2023 Jan 24;2:100128. doi: 10.1016/j.pecinn.2023.100128 (PMC10194195; doi:10.1016/j.pecinn.2023.100128), 2023-01-24
Supplement: mmc1.pdf [file mmc1.pdf]

# Multiple genetic tests study

Q2 *We would first like to ask a few questions to check that you are eligible for the survey.*

---

Q3 What is your age?

---

Q4 What is your gender?

Female

Male

Non-binary

Other 

---

Q5 Are you currently pregnant?

Yes

No

Not sure

Q6 Have you had a prior pregnancy?

Yes

No

Q7 We care about the quality of our data. In order for us to get the most accurate measures of your opinions, it is important that you thoughtfully provide your best answers to each question in this survey.

Do you commit to thoughtfully provide your best answers to each question in this survey?

- I will provide my best answers
- I will not provide my best answers
- I can't promise either way

**Q8 *Our team is doing a study to better understand women's interest in learning different types of genetic information. We would like to hear your thoughts.***

***Please read the following information. You will be asked to answer a few questions after 30 seconds.***

---

**Q9 Nowadays, it is possible to predict whether or not a person is likely to develop certain diseases by analyzing their genes. This is called genetic testing. Genetic testing is currently available for a limited number of diseases, but it may be available for more diseases in the future.**

**Genetic testing could tell you about your risks of different types of diseases.**

- **You could learn about your risk of developing a disease that may be able to be prevented or treated.** For example, you could learn that you are more likely to develop colon cancer. In this case, your doctor might recommend that you screen for colon cancer more often.
- **You could learn about your risk of developing a disease that cannot be prevented or treated.** For example, you could learn that you are more likely to develop a muscle disorder that gets worse over time or that you are more likely to develop early dementia from a disease that we don't know how to prevent or treat.
- **You could also learn more about how you respond to a medication for a disease.** For example, you could learn that a certain treatment would not be helpful for you or that you need a different dose of a medicine in order for it to work. You might also learn that you are more or less likely to develop a side effect from a certain treatment.

Another type of information that you might learn from genetic testing **is about a variation in one of your genes that does not affect your health, but could cause health problems if passed on to a child.** For example, you could learn that you have a variation in the gene that causes cystic fibrosis or a variation in the gene that causes sickle cell disease. Having a variation in this type of gene would not cause any health problems for you. But if you were to have children with someone who also had a variation in the same gene, then your children

could be born with these serious diseases. People can use this information to avoid passing this risk on to children or to prepare for having a child affected with a health condition.

**Q10 On a scale from 1 to 7, where 1 means not at all interested, and 7 means very interested, if it were offered by a gynecologist as part of routine care, how interested would you be in doing genetic testing to learn about:**

|                                                                                                | Not at all<br>interested<br>1 | 2                     | 3                     | Somewhat<br>interested<br>4 | 5                     | 6                     | Very<br>interested<br>7 |
|------------------------------------------------------------------------------------------------|-------------------------------|-----------------------|-----------------------|-----------------------------|-----------------------|-----------------------|-------------------------|
| Your risk of developing a <u>disease</u> that may be able to be prevented or treated           | <input type="radio"/>         | <input type="radio"/> | <input type="radio"/> | <input type="radio"/>       | <input type="radio"/> | <input type="radio"/> | <input type="radio"/>   |
| Your risk of developing a <u>cancer</u> that may be able to be prevented or treated            | <input type="radio"/>         | <input type="radio"/> | <input type="radio"/> | <input type="radio"/>       | <input type="radio"/> | <input type="radio"/> | <input type="radio"/>   |
| Your risk of developing a <u>disease</u> that cannot be prevented or treated                   | <input type="radio"/>         | <input type="radio"/> | <input type="radio"/> | <input type="radio"/>       | <input type="radio"/> | <input type="radio"/> | <input type="radio"/>   |
| How you would respond to a medication for a <u>disease</u>                                     | <input type="radio"/>         | <input type="radio"/> | <input type="radio"/> | <input type="radio"/>       | <input type="radio"/> | <input type="radio"/> | <input type="radio"/>   |
| A gene variation that does not affect your health but might affect the health of your children | <input type="radio"/>         | <input type="radio"/> | <input type="radio"/> | <input type="radio"/>       | <input type="radio"/> | <input type="radio"/> | <input type="radio"/>   |

-----

Q11

**For the next set of items, please mark what you think would be the best time for a**

**gynecologist to offer each of these types of genetic tests as part of routine care for women like you.**

|                                                                                                | When planning for a pregnancy | During pregnancy      | After pregnancy       | Not sure              | Should not be offered |
|------------------------------------------------------------------------------------------------|-------------------------------|-----------------------|-----------------------|-----------------------|-----------------------|
| Your risk of developing a <u>disease</u> that may be able to be prevented or treated           | <input type="radio"/>         | <input type="radio"/> | <input type="radio"/> | <input type="radio"/> | <input type="radio"/> |
| Your risk of developing a <u>cancer</u> that may be able to be prevented or treated            | <input type="radio"/>         | <input type="radio"/> | <input type="radio"/> | <input type="radio"/> | <input type="radio"/> |
| Your risk of developing a <u>disease</u> that cannot be prevented or treated                   | <input type="radio"/>         | <input type="radio"/> | <input type="radio"/> | <input type="radio"/> | <input type="radio"/> |
| How you would respond to a medication for a <u>disease</u>                                     | <input type="radio"/>         | <input type="radio"/> | <input type="radio"/> | <input type="radio"/> | <input type="radio"/> |
| A gene variation that does not affect your health but might affect the health of your children | <input type="radio"/>         | <input type="radio"/> | <input type="radio"/> | <input type="radio"/> | <input type="radio"/> |

Q12

**What information about your health would you most like to learn if you had genetic testing offered by your gynecologist?**

---



---



---

**Q13 For the next set of questions, we'd like to find out more about how you think about inherited risk.**

-----

**Q14 On a scale from 1 to 7 where 1 is not at all worried, and 7 is extremely worried, please describe how worried you are about the following:**

|                                                                                                           | Not at<br>all<br>worried<br>1 | 2                     | 3                     | Somewhat<br>worried<br>4 | 5                     | 6                     | Extremely<br>worried<br>7 |
|-----------------------------------------------------------------------------------------------------------|-------------------------------|-----------------------|-----------------------|--------------------------|-----------------------|-----------------------|---------------------------|
| That your genes put you at increased risk for developing a common disease, like heart disease or diabetes | <input type="radio"/>         | <input type="radio"/> | <input type="radio"/> | <input type="radio"/>    | <input type="radio"/> | <input type="radio"/> | <input type="radio"/>     |
| That you have a genetic variation that means you will certainly develop a disease                         | <input type="radio"/>         | <input type="radio"/> | <input type="radio"/> | <input type="radio"/>    | <input type="radio"/> | <input type="radio"/> | <input type="radio"/>     |
| That your children could be affected with a genetic condition that you have passed on                     | <input type="radio"/>         | <input type="radio"/> | <input type="radio"/> | <input type="radio"/>    | <input type="radio"/> | <input type="radio"/> | <input type="radio"/>     |

**Q15 The field of genetics is changing rapidly. We are interested to know whether you have heard about some of these developments. Please say whether the following statements are true or false or if you are unsure.**

|                                                                                        | True                  | False                 | Not sure              |
|----------------------------------------------------------------------------------------|-----------------------|-----------------------|-----------------------|
| Some diseases are caused by genes, environment, and lifestyle                          | <input type="radio"/> | <input type="radio"/> | <input type="radio"/> |
| A gene is a disease                                                                    | <input type="radio"/> | <input type="radio"/> | <input type="radio"/> |
| You can see a gene with the naked eye                                                  | <input type="radio"/> | <input type="radio"/> | <input type="radio"/> |
| Healthy parents can have a child with an inherited disease                             | <input type="radio"/> | <input type="radio"/> | <input type="radio"/> |
| A person with an altered (mutated) gene may be completely healthy                      | <input type="radio"/> | <input type="radio"/> | <input type="radio"/> |
| All serious diseases are inherited                                                     | <input type="radio"/> | <input type="radio"/> | <input type="radio"/> |
| Genes are instructions for making proteins, which help the body grow and work properly | <input type="radio"/> | <input type="radio"/> | <input type="radio"/> |
| The child of a person with an inherited disease will always have the same disease      | <input type="radio"/> | <input type="radio"/> | <input type="radio"/> |
| A gene is a piece of DNA                                                               | <input type="radio"/> | <input type="radio"/> | <input type="radio"/> |
| Altered (mutated) genes can cause disease                                              | <input type="radio"/> | <input type="radio"/> | <input type="radio"/> |
| Genes are inside of cells                                                              | <input type="radio"/> | <input type="radio"/> | <input type="radio"/> |
| A chromosome contains many genes                                                       | <input type="radio"/> | <input type="radio"/> | <input type="radio"/> |
| Genes determine traits such as height, eye color, and facial appearance                | <input type="radio"/> | <input type="radio"/> | <input type="radio"/> |
| A person has thousands of genes                                                        | <input type="radio"/> | <input type="radio"/> | <input type="radio"/> |
| Please mark "False" for this question                                                  | <input type="radio"/> | <input type="radio"/> | <input type="radio"/> |

|                                                                                       |                       |                       |                       |
|---------------------------------------------------------------------------------------|-----------------------|-----------------------|-----------------------|
| Identical twins have different sets of genes                                          | <input type="radio"/> | <input type="radio"/> | <input type="radio"/> |
| Humans have 20 pairs of chromosomes                                                   | <input type="radio"/> | <input type="radio"/> | <input type="radio"/> |
| Parents pass both copies of each chromosome to their child                            | <input type="radio"/> | <input type="radio"/> | <input type="radio"/> |
| A genetic test can tell you if you have a higher chance to develop a specific disease | <input type="radio"/> | <input type="radio"/> | <input type="radio"/> |

**Q16 On a scale from 1 to 7 where 1 is not at all important, and 7 is very important, please mark how important it is to you to learn more about how your genes may affect:**

|                                   | Not at all important<br>1 | 2                     | 3                     | Somewhat important<br>4 | 5                     | 6                     | Very important<br>7   |
|-----------------------------------|---------------------------|-----------------------|-----------------------|-------------------------|-----------------------|-----------------------|-----------------------|
| Your chance of getting cancer     | <input type="radio"/>     | <input type="radio"/> | <input type="radio"/> | <input type="radio"/>   | <input type="radio"/> | <input type="radio"/> | <input type="radio"/> |
| The health of any future children | <input type="radio"/>     | <input type="radio"/> | <input type="radio"/> | <input type="radio"/>   | <input type="radio"/> | <input type="radio"/> | <input type="radio"/> |

**Q17 Compared to other people your gender, age, and race, how likely do you think you are to get each of the following types of cancer in your lifetime?**

|                | A lot less likely<br>1 | Somewhat less likely<br>2 | About as likely<br>3  | Somewhat more likely<br>4 | A lot more likely<br>5 |
|----------------|------------------------|---------------------------|-----------------------|---------------------------|------------------------|
| Breast cancer  | <input type="radio"/>  | <input type="radio"/>     | <input type="radio"/> | <input type="radio"/>     | <input type="radio"/>  |
| Ovarian cancer | <input type="radio"/>  | <input type="radio"/>     | <input type="radio"/> | <input type="radio"/>     | <input type="radio"/>  |
| Colon cancer   | <input type="radio"/>  | <input type="radio"/>     | <input type="radio"/> | <input type="radio"/>     | <input type="radio"/>  |



Q18

**Please indicate how much you agree or disagree with each statement by choosing the number that best represents your views.**

|                                                                                                                          | Strong disagree<br>1  | Disagree<br>2         | Neither agree nor disagree<br>3 | Agree<br>4            | Strongly agree<br>5   |
|--------------------------------------------------------------------------------------------------------------------------|-----------------------|-----------------------|---------------------------------|-----------------------|-----------------------|
| I would rather receive my genetic test results, and be certain about my future health, even if the result is bad news.   | <input type="radio"/> | <input type="radio"/> | <input type="radio"/>           | <input type="radio"/> | <input type="radio"/> |
| I would like to know now if I am likely to develop (another) cancer so I can get used to the news.                       | <input type="radio"/> | <input type="radio"/> | <input type="radio"/>           | <input type="radio"/> | <input type="radio"/> |
| If I didn't receive my genetic test results I would always be wondering whether I was going to develop (another) cancer. | <input type="radio"/> | <input type="radio"/> | <input type="radio"/>           | <input type="radio"/> | <input type="radio"/> |
| The relief I would get from getting a low risk result makes it worth the risk that the result is bad.                    | <input type="radio"/> | <input type="radio"/> | <input type="radio"/>           | <input type="radio"/> | <input type="radio"/> |
| I think it is tempting fate to ask questions about future illness.                                                       | <input type="radio"/> | <input type="radio"/> | <input type="radio"/>           | <input type="radio"/> | <input type="radio"/> |
| I would rather live with uncertainty, than find out I was going to develop (another) cancer.                             | <input type="radio"/> | <input type="radio"/> | <input type="radio"/>           | <input type="radio"/> | <input type="radio"/> |
| Knowing the result of my genetic test would mean I felt more in control.                                                 | <input type="radio"/> | <input type="radio"/> | <input type="radio"/>           | <input type="radio"/> | <input type="radio"/> |
| It is better to know that I will develop (another) cancer, even if I can't prevent it.                                   | <input type="radio"/> | <input type="radio"/> | <input type="radio"/>           | <input type="radio"/> | <input type="radio"/> |

**Q19 The next question asks how confident you are about your ability to cope with genetic testing. Please mark the degree to which you agree or disagree with each statement.**

**I am confident that if I did have genetic testing, I would be able to cope...**

|                                                                                             | Strongly disagree<br>1 | Disagree<br>2         | Neither agree nor disagree<br>3 | Agree<br>4            | Strongly agree<br>5   |
|---------------------------------------------------------------------------------------------|------------------------|-----------------------|---------------------------------|-----------------------|-----------------------|
| if a gene variant indicating that I and my family are at risk of some cancer, was found     | <input type="radio"/>  | <input type="radio"/> | <input type="radio"/>           | <input type="radio"/> | <input type="radio"/> |
| if a gene variant indicating that I and my family are at risk of some cancer, was NOT found | <input type="radio"/>  | <input type="radio"/> | <input type="radio"/>           | <input type="radio"/> | <input type="radio"/> |
| if a gene variant was found that no one knew anything about                                 | <input type="radio"/>  | <input type="radio"/> | <input type="radio"/>           | <input type="radio"/> | <input type="radio"/> |
| with telling other members of my family about an inherited gene variant                     | <input type="radio"/>  | <input type="radio"/> | <input type="radio"/>           | <input type="radio"/> | <input type="radio"/> |

**Q20 For the next set of questions, we'd like to find out more about how you think about health and genetic testing.**

---

**Q21 On a scale from 1 to 5 where 1 is strongly disagree, and 5 is strongly agree, how much do you agree or disagree with the following statements:**

|                                                                                                        | Strongly disagree<br>1 | Disagree<br>2         | Neither agree nor disagree<br>3 | Agree<br>4            | Strongly agree<br>5   |
|--------------------------------------------------------------------------------------------------------|------------------------|-----------------------|---------------------------------|-----------------------|-----------------------|
| I make a point to read and watch stories about health                                                  | <input type="radio"/>  | <input type="radio"/> | <input type="radio"/>           | <input type="radio"/> | <input type="radio"/> |
| I really enjoy learning about health issues                                                            | <input type="radio"/>  | <input type="radio"/> | <input type="radio"/>           | <input type="radio"/> | <input type="radio"/> |
| To be and stay healthy it's critical to be informed about health issues                                | <input type="radio"/>  | <input type="radio"/> | <input type="radio"/>           | <input type="radio"/> | <input type="radio"/> |
| The amount of health information available today makes it easier for me to take care of my health      | <input type="radio"/>  | <input type="radio"/> | <input type="radio"/>           | <input type="radio"/> | <input type="radio"/> |
| When I take medicine, I try to get as much information as possible about its benefits and side effects | <input type="radio"/>  | <input type="radio"/> | <input type="radio"/>           | <input type="radio"/> | <input type="radio"/> |
| I need to know about health issues so I can keep myself and my family healthy                          | <input type="radio"/>  | <input type="radio"/> | <input type="radio"/>           | <input type="radio"/> | <input type="radio"/> |
| Please mark "2" for this question.                                                                     | <input type="radio"/>  | <input type="radio"/> | <input type="radio"/>           | <input type="radio"/> | <input type="radio"/> |
| Before making a decision about my health, I find out everything I can about this issue                 | <input type="radio"/>  | <input type="radio"/> | <input type="radio"/>           | <input type="radio"/> | <input type="radio"/> |
| It's important to me to be informed about health issues                                                | <input type="radio"/>  | <input type="radio"/> | <input type="radio"/>           | <input type="radio"/> | <input type="radio"/> |

**Q22 On a scale from 1 to 7 where 1 is strongly disagree, and 7 is strongly agree, please mark how much you agree or disagree with the following statements.**

|                                                                                                          | Strongly disagree<br>1 | 2                     | 3                     | Neither agree nor disagree<br>4 | 5                     | 6                     | Strongly agree<br>7   |
|----------------------------------------------------------------------------------------------------------|------------------------|-----------------------|-----------------------|---------------------------------|-----------------------|-----------------------|-----------------------|
| The people who mean the most to me think I should learn more about <u>ways I can keep myself healthy</u> | <input type="radio"/>  | <input type="radio"/> | <input type="radio"/> | <input type="radio"/>           | <input type="radio"/> | <input type="radio"/> | <input type="radio"/> |
| The people who mean the most to me think I should learn more about <u>genetic testing.</u>               | <input type="radio"/>  | <input type="radio"/> | <input type="radio"/> | <input type="radio"/>           | <input type="radio"/> | <input type="radio"/> | <input type="radio"/> |

**Q23 On a scale from 1 to 7 where 1 is not at all motivated, and 7 is very motivated, how motivated would say you are to do what these people want you to do regarding...**

|                           | Not at all motivated<br>1 | 2                     | 3                     | Somewhat motivated<br>4 | 5                     | 6                     | Very motivated<br>7   |
|---------------------------|---------------------------|-----------------------|-----------------------|-------------------------|-----------------------|-----------------------|-----------------------|
| keeping yourself healthy? | <input type="radio"/>     | <input type="radio"/> | <input type="radio"/> | <input type="radio"/>   | <input type="radio"/> | <input type="radio"/> | <input type="radio"/> |
| genetic testing?          | <input type="radio"/>     | <input type="radio"/> | <input type="radio"/> | <input type="radio"/>   | <input type="radio"/> | <input type="radio"/> | <input type="radio"/> |

**Q24 Do you currently have a romantic partner?**

- Yes
- No

Q25 How would you characterize your current relationship with your romantic partner?

- Married
- Living as married
- Serious dating, but not living as married
- Divorced
- Separated
- Casual dating
- Other, please specify \_\_\_\_\_

Q26 On a scale from 1 to 7 where 1 is strongly disagree, and 7 is strongly agree, please mark how much you agree or disagree with the following statement.

|                                                                                                          | Strongly disagree<br>1 | 2                     | 3                     | Neither agree<br>nor disagree<br>4 | 5                     | 6                     | Strongly agree<br>7   |
|----------------------------------------------------------------------------------------------------------|------------------------|-----------------------|-----------------------|------------------------------------|-----------------------|-----------------------|-----------------------|
| My romantic partner would be interested in having genetic testing for <u>their own personal health</u> . | <input type="radio"/>  | <input type="radio"/> | <input type="radio"/> | <input type="radio"/>              | <input type="radio"/> | <input type="radio"/> | <input type="radio"/> |
| My romantic partner would be interested in having genetic testing for <u>planning a pregnancy</u> .      | <input type="radio"/>  | <input type="radio"/> | <input type="radio"/> | <input type="radio"/>              | <input type="radio"/> | <input type="radio"/> | <input type="radio"/> |

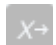

Q27

Please picture how your romantic partner would react when you tell them about genetic

testing that may provide information about the health of your future children. Then, indicate the extent to which you agree or disagree with the following statements.

|                                                                                                         | Strongly disagree<br>1 | Disagree<br>2         | Neither agree nor disagree<br>3 | Agree<br>4            | Strongly agree<br>5   |
|---------------------------------------------------------------------------------------------------------|------------------------|-----------------------|---------------------------------|-----------------------|-----------------------|
| My partner will help me work through my thoughts and feelings about genetic testing.                    | <input type="radio"/>  | <input type="radio"/> | <input type="radio"/>           | <input type="radio"/> | <input type="radio"/> |
| My partner will patiently and sensitively listen to me about genetic testing.                           | <input type="radio"/>  | <input type="radio"/> | <input type="radio"/>           | <input type="radio"/> | <input type="radio"/> |
| When I tell my partner about genetic testing, they will not pay attention.                              | <input type="radio"/>  | <input type="radio"/> | <input type="radio"/>           | <input type="radio"/> | <input type="radio"/> |
| My partner will help me cope with my concerns about genetic testing.                                    | <input type="radio"/>  | <input type="radio"/> | <input type="radio"/>           | <input type="radio"/> | <input type="radio"/> |
| My partner will avoid a discussion with me about genetic testing.                                       | <input type="radio"/>  | <input type="radio"/> | <input type="radio"/>           | <input type="radio"/> | <input type="radio"/> |
| My partner will show genuine concern for my concerns about genetic testing.                             | <input type="radio"/>  | <input type="radio"/> | <input type="radio"/>           | <input type="radio"/> | <input type="radio"/> |
| My partner will give me good advice on genetic testing when I ask for it.                               | <input type="radio"/>  | <input type="radio"/> | <input type="radio"/>           | <input type="radio"/> | <input type="radio"/> |
| My partner will make it very easy to discuss my personal feelings about genetic testing.                | <input type="radio"/>  | <input type="radio"/> | <input type="radio"/>           | <input type="radio"/> | <input type="radio"/> |
| My partner will listen to my side of the story about genetic testing even if he thinks that I am wrong. | <input type="radio"/>  | <input type="radio"/> | <input type="radio"/>           | <input type="radio"/> | <input type="radio"/> |
| My partner will make an effort to make me feel better regarding genetic testing.                        | <input type="radio"/>  | <input type="radio"/> | <input type="radio"/>           | <input type="radio"/> | <input type="radio"/> |



**Q28 On a scale from 1 to 7 where 1 is strongly disagree, and 7 is strongly agree, please mark how much you agree or disagree with the following statement.**

|                                                                                                 | Strongly disagree<br>1 | 2                     | 3                     | Neither<br>agree<br>nor<br>disagree<br>4 | 5                     | 6                     | Strongly<br>agree<br>7 |
|-------------------------------------------------------------------------------------------------|------------------------|-----------------------|-----------------------|------------------------------------------|-----------------------|-----------------------|------------------------|
| Most of my family members whose opinion I value, would be interested in having genetic testing. | <input type="radio"/>  | <input type="radio"/> | <input type="radio"/> | <input type="radio"/>                    | <input type="radio"/> | <input type="radio"/> | <input type="radio"/>  |

**Q29 What type of healthcare provider would you say that you have the strongest relationship with?**

---

---

---

-----

**Q30 Do you currently have a gynecologist that you would seek health care from?**

- Yes
  - No
-

**Q31 Please choose the response to each statement below that best describes how you feel about your current gynecologist.**

|                                                                                                              | None<br>of<br>the<br>time<br>0 | Some or a<br>little of the<br>time<br>1 | Occasionally<br>or a<br>moderate<br>amount of the<br>time<br>2 | Most of the<br>time<br>3 | All of the<br>time<br>4 |
|--------------------------------------------------------------------------------------------------------------|--------------------------------|-----------------------------------------|----------------------------------------------------------------|--------------------------|-------------------------|
| How often does your gynecologist discuss options and choices with you before health care decisions are made? | <input type="radio"/>          | <input type="radio"/>                   | <input type="radio"/>                                          | <input type="radio"/>    | <input type="radio"/>   |
| My gynecologist is committed to providing the best care possible.                                            | <input type="radio"/>          | <input type="radio"/>                   | <input type="radio"/>                                          | <input type="radio"/>    | <input type="radio"/>   |
| My gynecologist is sincerely interested in me as a person.                                                   | <input type="radio"/>          | <input type="radio"/>                   | <input type="radio"/>                                          | <input type="radio"/>    | <input type="radio"/>   |
| My gynecologist is an excellent listener.                                                                    | <input type="radio"/>          | <input type="radio"/>                   | <input type="radio"/>                                          | <input type="radio"/>    | <input type="radio"/>   |
| My gynecologist accepts me for who I am.                                                                     | <input type="radio"/>          | <input type="radio"/>                   | <input type="radio"/>                                          | <input type="radio"/>    | <input type="radio"/>   |
| My gynecologist tells me the complete truth about my health-related problems.                                | <input type="radio"/>          | <input type="radio"/>                   | <input type="radio"/>                                          | <input type="radio"/>    | <input type="radio"/>   |
| My gynecologist treats me as an individual.                                                                  | <input type="radio"/>          | <input type="radio"/>                   | <input type="radio"/>                                          | <input type="radio"/>    | <input type="radio"/>   |
| My gynecologist makes me feel that I am worthy of their time and effort.                                     | <input type="radio"/>          | <input type="radio"/>                   | <input type="radio"/>                                          | <input type="radio"/>    | <input type="radio"/>   |
| My gynecologist takes the time to listen to me during each appointment.                                      | <input type="radio"/>          | <input type="radio"/>                   | <input type="radio"/>                                          | <input type="radio"/>    | <input type="radio"/>   |
| I feel comfortable talking to my gynecologist about my personal issues.                                      | <input type="radio"/>          | <input type="radio"/>                   | <input type="radio"/>                                          | <input type="radio"/>    | <input type="radio"/>   |
| I feel better after seeing my gynecologist.                                                                  | <input type="radio"/>          | <input type="radio"/>                   | <input type="radio"/>                                          | <input type="radio"/>    | <input type="radio"/>   |

How often do you think about changing to a new gynecologist?

How often does your gynecologist consider your need for privacy?

**Q32 For the last set of questions, we'd like to ask more about you.**

---

Q33 What is the highest level of school that you have completed?

- Junior high or some high school
  - High school degree or GED
  - Some college
  - Associate degree
  - College degree
  - Graduate degree
-

Q34 What is your race? (Check all that apply)

- White/Caucasian
  - Black/African-American
  - Asian
  - Pacific Islander/Native Hawaiian
  - Native American/Alaska Native
  - Other \_\_\_\_\_
- 

Q35 What is your ethnicity?

- Latino/Hispanic
  - Non-Hispanic/Non-Latino
  - Other \_\_\_\_\_
- 

Q36 Do your parents or grandparents have any Ashkenazi (Eastern European) Jewish ancestry?

- Yes
  - No
  - Not sure
-

Q37 What is your zip code?

---

Q38 Think about your household's total income. About how much did your household receive in the last year?

- Less than \$25,000
- \$25,000-\$49,999
- \$50,000-\$74,999
- \$75,000-\$99,999
- \$100,000 or more
- Prefer not to answer

Q39 Do you currently have health insurance?

- Yes, I have private insurance (for example, through my job, HMO)
- Yes, I have public insurance (for example, Medicaid, Medicare)
- No

Q40 Have you ever received genetic testing as part of your clinical care?

- Yes
- No
- Don't know

Q41 What type of genetic testing?

---

Q42 Have you ever been diagnosed as having cancer?

Yes

No

Q43 What type of cancer(s) do you have?

---

Q44 Have any of your family members ever had cancer?

Yes

No

Not sure

Q45 What type of cancer(s)?

---

Q46 Do you have any biological children?

Yes

No

-----

Q47 Are you planning to become pregnant in the next year?

- Yes
- No
- Not sure

**Q48 The next questions are about how you prefer to get information. For each of the following questions, please mark the number that best reflects your answer.**

|                                                                                                 | Not at<br>all<br>helpful<br>1 | 2                     | 3                     | 4                     | 5                     | Extremely<br>helpful<br>6 |
|-------------------------------------------------------------------------------------------------|-------------------------------|-----------------------|-----------------------|-----------------------|-----------------------|---------------------------|
| When reading the newspaper, how helpful do you find tables and graphs that are part of a story? | <input type="radio"/>         | <input type="radio"/> | <input type="radio"/> | <input type="radio"/> | <input type="radio"/> | <input type="radio"/>     |

-----



**Q49 Please mark the number that best reflects your answer.**

|                                                                                                                                                                 | Always<br>prefer<br>words<br>1 | 2                     | 3                     | 4                     | 5                     | Always<br>prefer<br>numbers<br>6 |
|-----------------------------------------------------------------------------------------------------------------------------------------------------------------|--------------------------------|-----------------------|-----------------------|-----------------------|-----------------------|----------------------------------|
| When people tell you the chance of something happening, do you prefer that they use words (e.g., "it rarely happens") or numbers (e.g., "there's a 1% chance")? | <input type="radio"/>          | <input type="radio"/> | <input type="radio"/> | <input type="radio"/> | <input type="radio"/> | <input type="radio"/>            |

**Q50 Please mark the number that best reflects your answer.**

|                                                                                                                                                                                                                   | Always<br>prefer<br>words<br>1 | 2                     | 3                     | 4                     | 5                     | Always<br>prefer<br>percentages<br>6 |
|-------------------------------------------------------------------------------------------------------------------------------------------------------------------------------------------------------------------|--------------------------------|-----------------------|-----------------------|-----------------------|-----------------------|--------------------------------------|
| When you hear a weather forecast, do you prefer predictions using percentages (e.g., "there will be a 20% chance of rain today") or predictions using only words (e.g., "there is a small chance of rain today")? | <input type="radio"/>          | <input type="radio"/> | <input type="radio"/> | <input type="radio"/> | <input type="radio"/> | <input type="radio"/>                |

**Q51 Please mark the number that best reflects your answer.**

|                                                           | Never<br>1            | 2                     | 3                     | 4                     | 5                     | Very often<br>6       |
|-----------------------------------------------------------|-----------------------|-----------------------|-----------------------|-----------------------|-----------------------|-----------------------|
| How often do you find numerical information to be useful? | <input type="radio"/> |

**Q52 For each of the following questions, please mark the number that best reflects how good you are at doing the following things:**

|                                                                                           | Not<br>at all<br>good<br>1 | 2                     | 3                     | 4                     | 5                     | Extremely<br>good<br>6 |
|-------------------------------------------------------------------------------------------|----------------------------|-----------------------|-----------------------|-----------------------|-----------------------|------------------------|
| How good are you<br>at working with<br>fractions?                                         | <input type="radio"/>      | <input type="radio"/> | <input type="radio"/> | <input type="radio"/> | <input type="radio"/> | <input type="radio"/>  |
| How good are you<br>at working with<br>percentages?                                       | <input type="radio"/>      | <input type="radio"/> | <input type="radio"/> | <input type="radio"/> | <input type="radio"/> | <input type="radio"/>  |
| How good are you<br>at calculating a<br>15% tip?                                          | <input type="radio"/>      | <input type="radio"/> | <input type="radio"/> | <input type="radio"/> | <input type="radio"/> | <input type="radio"/>  |
| How good are you<br>at figuring out how<br>much a shirt will<br>cost if it is 25%<br>off? | <input type="radio"/>      | <input type="radio"/> | <input type="radio"/> | <input type="radio"/> | <input type="radio"/> | <input type="radio"/>  |

---

**Q53 How often do you have someone (like a family member, friend, hospital/clinic worker or caregiver) help you read hospital materials?**

- None of the time1
  - A little of the time2
  - Some of the time3
  - Most of the time4
  - All of the time5
-

**Q54 How often do you have problems learning about your medical condition because of difficulty understanding written information?**

- None of the time1
- A little of the time2
- Some of the time3
- Most of the time4
- All of the time5

**Q55 How confident are you filling out medical forms by yourself?**

- Not at all1
- A little bit2
- Somewhat3
- Quite a bit4
- Extremely5

**Q56 That is the end of the questions. Do you have anything else that you would like to share with the research team?**

---
